# Supplementary material for: High-efficiency detection of primary amine-based chiral molecules by a facile aldimine condensation reaction
Source: Royal Society of Chemistry journal article supplement (doi:10.1039/d4ra06291d), 2024-01-01
Supplement: d4ra06291d1.pdf [file d4ra06291d1.pdf]

## Supporting information

### **High-Efficiency Detection of Primary Amines-Based Chiral Molecules by a Facile Aldimine Condensation Reaction**

*Yang Yu,<sup>##a</sup> Aiyan Shi,<sup>#b</sup> Tongtong Wang,<sup>a</sup> Tiefeng Wang,<sup>a</sup> Fei Xu<sup>a</sup>*

a. College of Advanced Materials Engineering, Jiaxing Nanhu University, 314001, Jiaxing, P. R. China.

b. Smart Materials for Architecture Research Lab, Innovation Center of Yangtze River Delta, Zhejiang University, Jiaxing, 314100, P. R. China

Email: yuyang@jxnhu.edu.cn

## Table of contents

|                                      |          |
|--------------------------------------|----------|
| <b>1. Experimental details.....</b>  | <b>3</b> |
| <b>2. Supplementary Figures.....</b> | <b>6</b> |

## 1. Experimental details

### Materials

L-cysteine hydrochloride were bought from Alfa Aesar. D-cysteine hydrochloride was purchased from meryer. D/L-glutamic acid, D/L-Histidine, acetonitrile (ACN) and butylamine were purchased from Aladdin Chemicals. Tetrabutyl ammonium hydroxide (TBAOH) was purchased from Energy Chemicals. (S)-(-)- $\alpha$ -methylbenzylamine (S)-(-)- $\alpha$ -MBA) was bought from Adamas-beta®. Trifluoroacetic acid (CF<sub>3</sub>COOH) was bought from Macklin Chemicals. 6'-(diethylamino)-3'-hydroxy-3-oxo-3H-spiro[isobenzofuran-1,9'-xanthene]-4'-carbaldehyde (R-C) shown in Scheme S1 was synthesized according to the previous work (Adv. Sci. 2022, 9, 2202636) and its <sup>1</sup>H NMR spectrum was shown in Figure S1. Water was purified by a Milli-Q system.

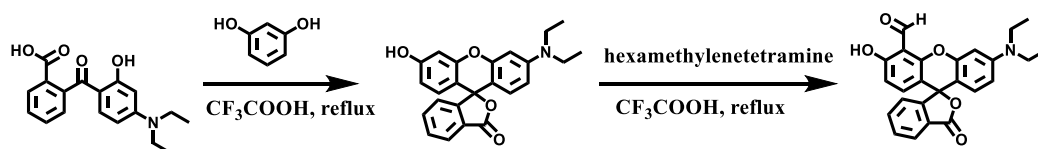

**Scheme S1.** Synthetic route of the molecule R-C.

### Instruments and Characterizations

UV-vis absorption spectra were measured on a Shimadzu UV-2550 double-beam spectrophotometer. Circular dichroism (CD) spectra were collected on a Chirascan circular dichroism spectrometer (Applied Photophysics Ltd.), and the measured data were treated with smoothing processing then. <sup>1</sup>H NMR and <sup>13</sup>C NMR spectra were measured by a Bruker AVANCE NEO 400 M NMR spectrometer. Chemical shift values were given relative to tetramethylsilane (TMS). LC-HRMS analysis was obtained by a Shimadzu LCMS-IT-TOF mass spectrometer.

### Detection process for primary amines-based chiral molecules

Firstly, the R-C was dissolved in ACN with a specific concentration. Then, the chiral molecules with primary amines (-NH<sub>2</sub>) was dissolved in water with a specific concentration. After the above two solutions were totally dissolved, they were mixed in a transparent bottle and stirred at 30 °C for 12 hours, so that to react completely. The UV-vis absorption and CD spectra of this reaction product were further measured so that to determine the concentration and configuration of the chiral analyte.

## 2. Supplementary Figures

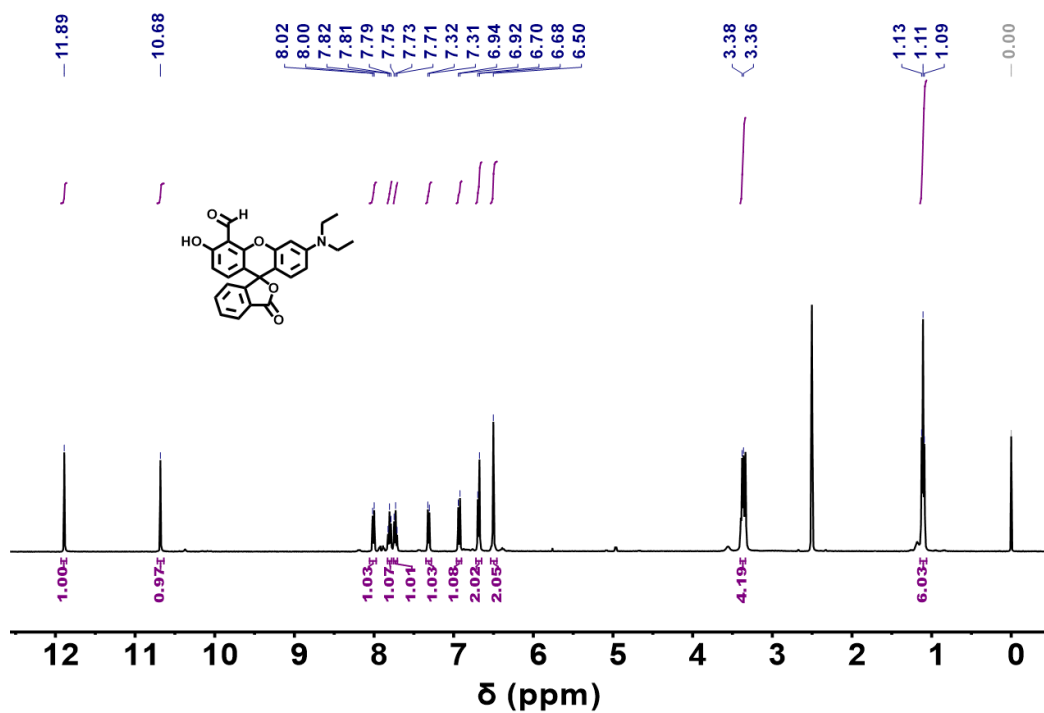

**Figure S1.** <sup>1</sup>H NMR spectrum of R-C in deuterated DMSO recorded at 400 M Hz at room temperature.

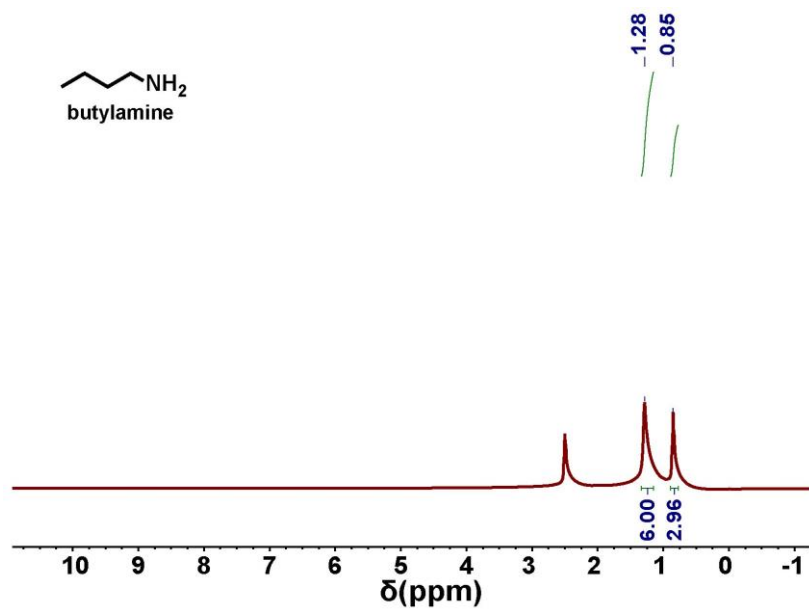

**Figure S2.**  $^1\text{H}$  NMR spectrum of butylamine in deuterated DMSO recorded at 400 MHz at room temperature.

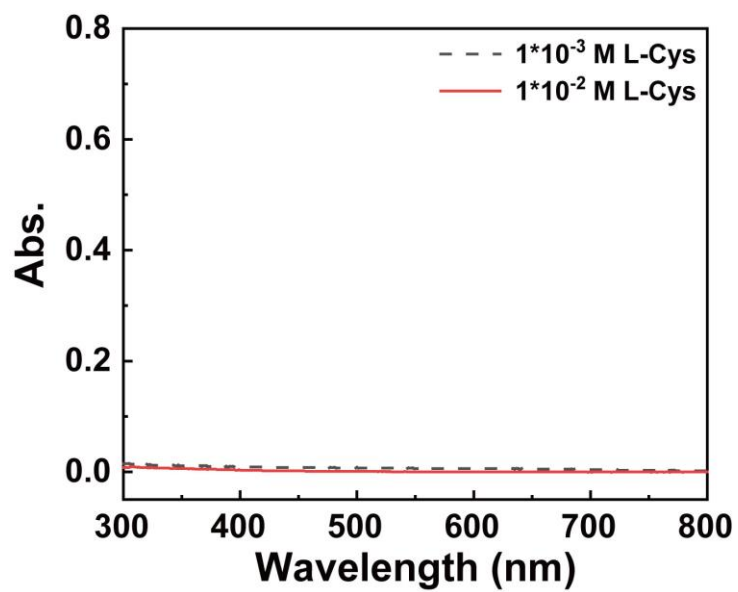

**Figure S3.** UV-vis absorption spectra of the  $1.0 \times 10^{-3}$  M and  $1.0 \times 10^{-3}$  M L-Cys in deionized water, respectively.

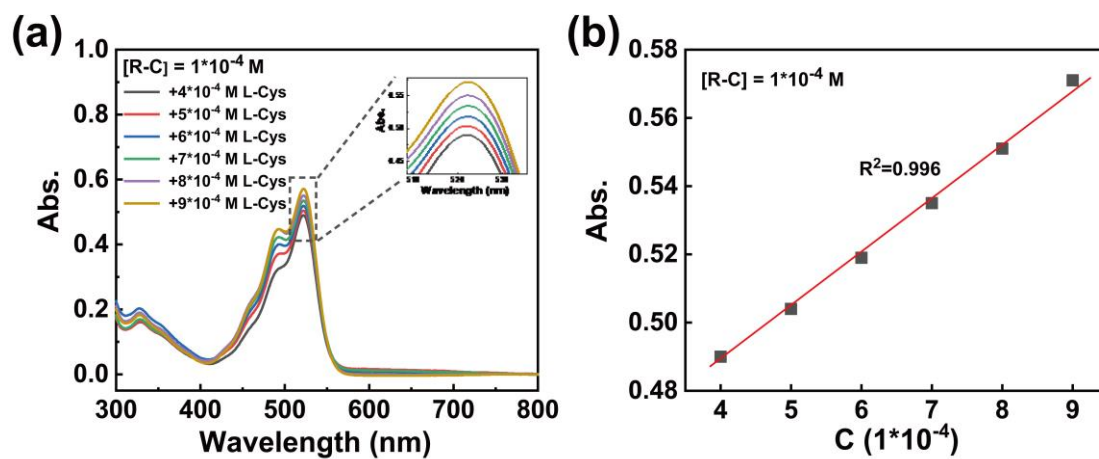

**Figure S4.** (a) UV-vis absorption spectra and (b) corresponding absorption values at 522 nm of the mixture of  $1.0 \times 10^{-4}$  M R-C in CH<sub>3</sub>CN and L-Cys in deionized water with various concentrations.

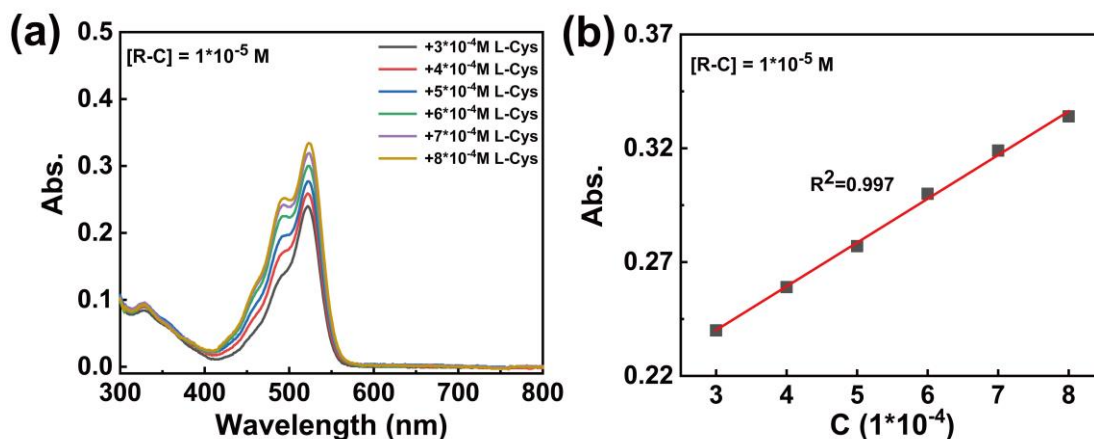

**Figure S5.** (a) UV-vis absorption spectra and (b) corresponding absorption values at 522 nm of the mixture of  $1.0 \times 10^{-5}$  M R-C in  $\text{CH}_3\text{CN}$  and L-Cys in deionized water with various concentrations.

The detailed calculation process of LOQ (limit of quantitation) was shown below:

$$\text{LOQ} = 10 \cdot \text{RSD} / k$$

- (1) According to the calibration curve, the  $k$  was  $0.01923 \times 10^4$ ;
- (2) According to the absorption curves of blank samples (measured 11 times), the RSD (relative standard deviation) was 0.0022;
- (3) Thus, the value of LOQ was  $(10 \cdot 0.0022) / (0.01923 \times 10^4) = 1.14 \times 10^{-4}$



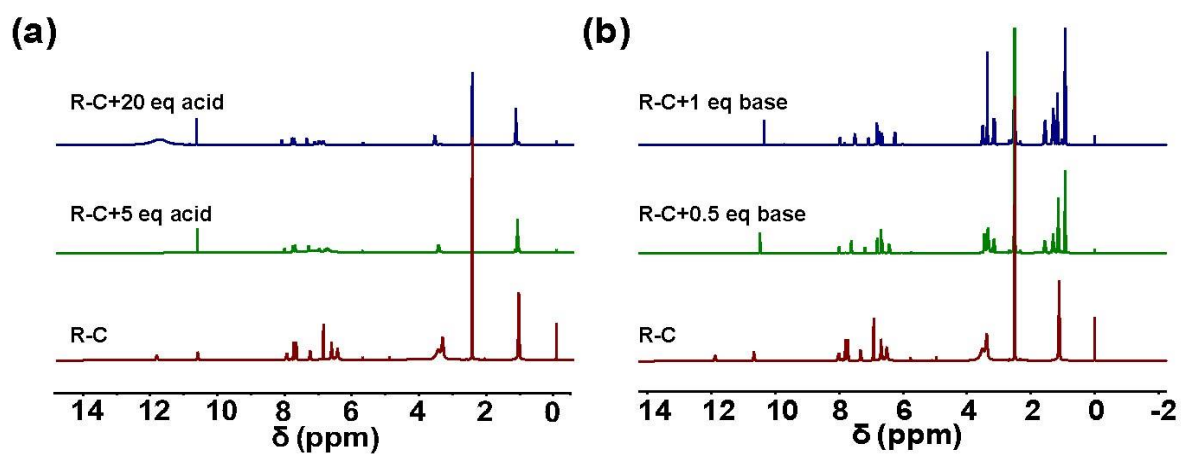

**Figure S6.** (a)  $^1\text{H}$  NMR spectra of R-C and when it was added various eq acid (TFA) in deuterated DMSO, respectively. (b)  $^1\text{H}$  NMR spectra of Rhodol-CHO and when it was added various eq base (TBAOH) in deuterated DMSO, respectively.

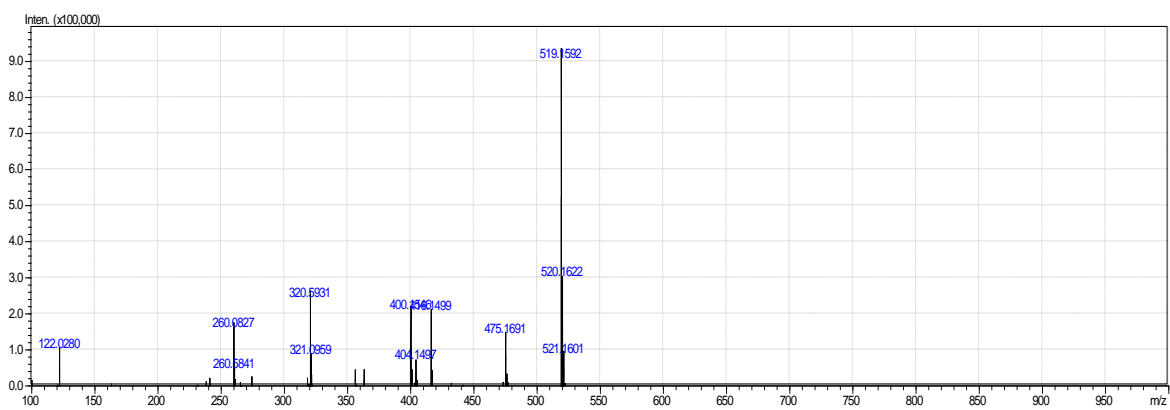

**Figure S7.** Mass spectrum of the mixture of R-C and L-Cys at room temperature.

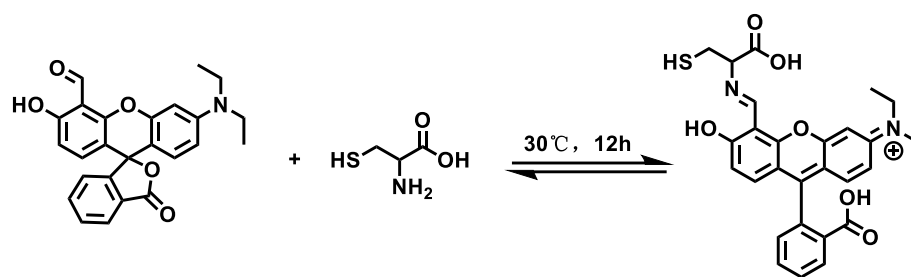

**Figure S8.** Reaction route of R-C and Cys.

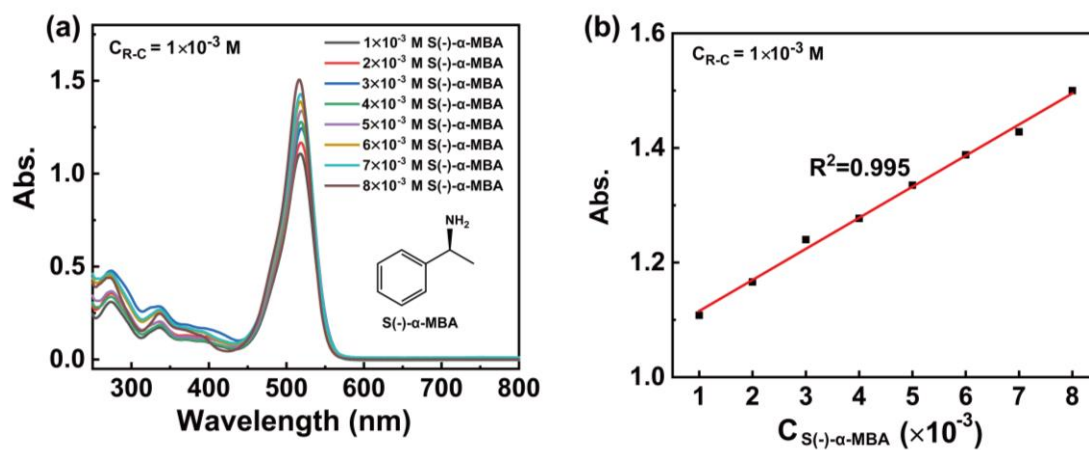

**Figure S9.** (a) UV-vis absorption spectra and (b) corresponding absorption values at 518 nm of the mixture of  $1.0 \times 10^{-3}$  M R-C in  $\text{CH}_3\text{CN}$  and S(-)- $\alpha$ -MBA with various concentrations in deionized water.
